# Supplementary material for: Five years of exercise intervention at different intensities and development of white matter hyperintensities in community dwelling older adults, a Generation 100 sub-study
Source: publisher site journal article supplement (doi:10.18632/aging.203843), 2022-01-18
Supplement: Supplementary file [file aging-v14i2-203843-supplementary-material-SD1.pdf]

## SUPPLEMENTARY FIGURE

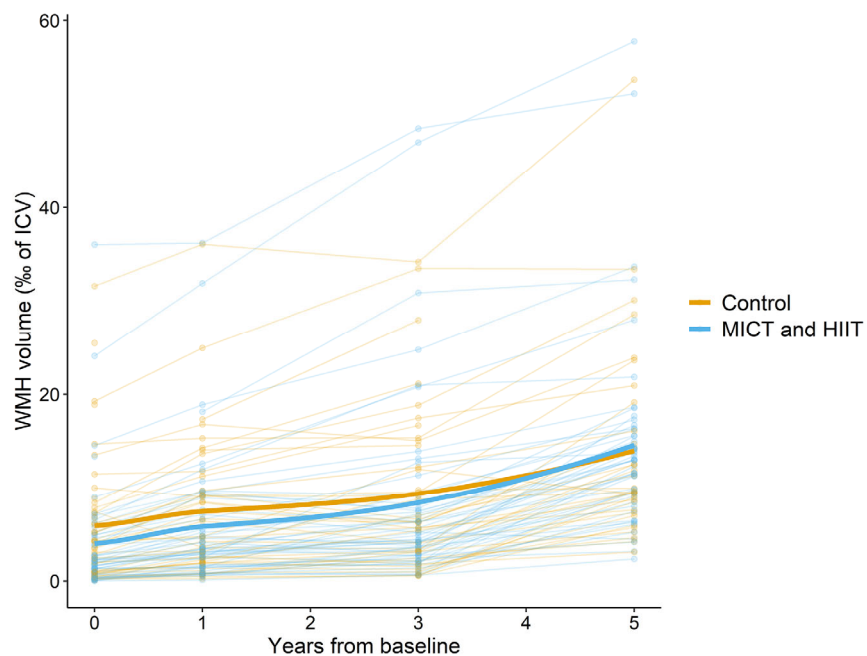

**Supplementary Figure 1. Illustration of the interaction effect demonstrated in the linear mixed model investigation (Supplementary Table 1).** The mean WMH volume in % of ICV at baseline, and after one, three, and five years of the intervention in the Control group (in orange) and the combined supervised exercise group (MICT&HIIT) in blue. Abbreviations: WMH: white matter hyperintensities; ICV: intracranial volume; MICT: moderate-intensity continuous training; HIIT: high-intensity interval training.
