# Supplementary material for: Five years of exercise intervention at different intensities and development of white matter hyperintensities in community dwelling older adults, a Generation 100 sub-study
Source: publisher site journal article supplement (doi:10.18632/aging.203843), 2022-01-18
Supplement: Supplementary file [file aging-v14i2-203843-supplementary-material-SD2.pdf]

## SUPPLEMENTARY TABLE

**Supplementary Table 1. The effect of the interventions across the five-year intervention period on WMH, PWMH, DWMH and WM-hypo volumes (corrected for ICV) adjusted for age, sex, and baseline outcome values for the two intervention groups combined (MICT and HIIT) compared to the control group.**

| Predictors       | WMH   |             |                | PWMH. |             |                | DWMH. |             |                | WM-hypo. |             |                |
|------------------|-------|-------------|----------------|-------|-------------|----------------|-------|-------------|----------------|----------|-------------|----------------|
|                  | Est.  | CI (95%)    | <i>p-value</i> | Est.  | CI (95%)    | <i>p-value</i> | Est.  | CI (95%)    | <i>p-value</i> | Est.     | CI (95%)    | <i>p-value</i> |
| Women            | 2.01  | -1.21, 5.22 | 0.219          | 0.88  | -1.07, 2.82 | 0.375          | 1.21  | -0.34, 2.75 | 0.124          | -0.79    | -1.81, 0.24 | 0.130          |
| Age              | 0.26  | -0.56, 1.09 | 0.528          | 0.46  | -0.04, 0.97 | 0.073          | -0.17 | -0.56, 0.23 | 0.404          | 0.29     | 0.02, 0.56  | <b>0.035</b>   |
| Year one         | 1.05  | -0.68, 2.79 | 0.232          | 0.49  | -0.67, 1.65 | 0.403          | 0.84  | 0.08, 1.60  | <b>0.030</b>   | 0.01     | -0.69, 0.70 | 0.983          |
| Year three       | 2.40  | -0.51, 5.30 | 0.105          | 1.21  | -0.62, 3.04 | 0.193          | 1.30  | -0.04, 2.63 | 0.057          | 0.20     | -0.83, 1.23 | 0.701          |
| Year five        | 7.67  | 3.13, 12.21 | <b>0.001</b>   | 4.57  | 1.76, 7.38  | <b>0.002</b>   | 3.07  | 0.95, 5.19  | <b>0.005</b>   | 0.72     | -0.81, 2.24 | 0.356          |
| MICT&HIIT        | -1.17 | -4.39, 2.05 | 0.473          | -0.97 | -2.93, 1.00 | 0.331          | -0.42 | -1.96, 1.13 | 0.591          | -0.52    | -1.63, 0.61 | 0.363          |
| MICT&HIIT*1-year | 0.08  | -1.66, 1.82 | 0.931          | 0.05  | -1.19, 1.28 | 0.943          | -0.15 | -0.84, 0.55 | 0.680          | 0.31     | -0.49, 1.11 | 0.444          |
| MICT&HIIT*3-year | 0.73  | -1.06, 2.51 | 0.422          | 0.55  | -0.71, 1.81 | 0.391          | 0.06  | -0.66, 0.76 | 0.880          | -0.05    | -0.87, 0.77 | 0.897          |
| MICT&HIIT*5-year | 1.21  | -0.61, 3.04 | 0.191          | 1.16  | 0.10, 2.22  | <b>0.032</b>   | -0.18 | -0.91, 0.54 | 0.620          | -0.44    | -1.27, 0.39 | 0.300          |
| AIC              |       |             | 2105.5         |       |             | 1819.4         |       |             | 1489.8         |          |             | 1519.7         |

There was a significant interaction between year and the exercise interventions combined (MICT and HIIT), this term was therefore kept for final analysis. Other non-significant interaction terms (between sex, age, or the exercise interventions combined [MICT&HIIT]) were removed from the statistical models. Abbreviations: WMH: white matter hyperintensities; PWMH: periventricular WMH; DWMH: deep WMH; WM-hypo: white matter hypointensities; ICV: intracranial volume; CI: confidence interval; MICT: moderate-intensity continuous training; HIIT: high-intensity interval training; MICT&HIIT: MICT and HIIT combined into one intervention group; Est.: estimates; AIC: Akaike's information criterion.
